# Supplementary material for: Effectiveness of Raw, Natural Medical Cannabis Flower for Treating Insomnia under Naturalistic Conditions
Source: PubMed Central journal article supplement (PMC6164964; doi:10.3390/medicines5030075), 2018-07-11
Supplement: medicines-05-00075-s001.pdf [file medicines-05-00075-s001.pdf]

# Supplementary Materials: Effectiveness of Raw, Natural Medical Cannabis Flower for Treating Insomnia under Naturalistic Conditions

Jacob M. Vigil, Sarah S. Stith, Jegason P. Diviant, Franco Brockelman, Keenan Keeling and Branden Hall

**Table S1.** Categories and Frequency of Side Effect Reporting.

| Side Effect | % Sessions Reporting | Category         |
|-------------|----------------------|------------------|
| Foggy       | 25%                  | Negative         |
| Dry Mouth   | 23%                  | Negative         |
| Forgetful   | 12%                  | Negative         |
| Unmotivated | 12%                  | Negative         |
| Dizzy       | 10%                  | Negative         |
| Red Eyes    | 9%                   | Negative         |
| Restless    | 9%                   | Negative         |
| Scattered   | 9%                   | Negative         |
| Anxious     | 7%                   | Negative         |
| Confused    | 4%                   | Negative         |
| Headache    | 4%                   | Negative         |
| Paranoid    | 3%                   | Negative         |
| Irritable   | 3%                   | Negative         |
| Relaxed     | 72%                  | Positive         |
| Peaceful    | 54%                  | Positive         |
| Comfy       | 49%                  | Positive         |
| Dreamy      | 47%                  | Positive         |
| Chill       | 37%                  | Positive         |
| Happy       | 19%                  | Positive         |
| Reflective  | 18%                  | Positive         |
| Great       | 17%                  | Positive         |
| Light       | 16%                  | Positive         |
| Tuned       | 13%                  | Positive         |
| Focused     | 11%                  | Positive         |
| Grateful    | 11%                  | Positive         |
| Optimistic  | 11%                  | Positive         |
| Clear       | 9%                   | Positive         |
| Frisky      | 7%                   | Positive         |
| Creative    | 6%                   | Positive         |
| Productive  | 4%                   | Positive         |
| Energetic   | 4%                   | Positive         |
| Active      | 2%                   | Positive         |
| Sleepy      | 56%                  | Context-Specific |
| High        | 45%                  | Context-Specific |
| Couchlocked | 28%                  | Context-Specific |
| Thirsty     | 26%                  | Context-Specific |
| Tingly      | 20%                  | Context-Specific |

|            |     |                  |
|------------|-----|------------------|
| Hungry     | 16% | Context-Specific |
| Distracted | 12% | Context-Specific |
| Silly      | 7%  | Context-Specific |
| Visuals    | 5%  | Context-Specific |
| Talkative  | 4%  | Context-Specific |

---

Notes: Negative, Positive, and Context-Specific side effects are listed by category and ordered by the percent of sessions reporting that side effect in the data.

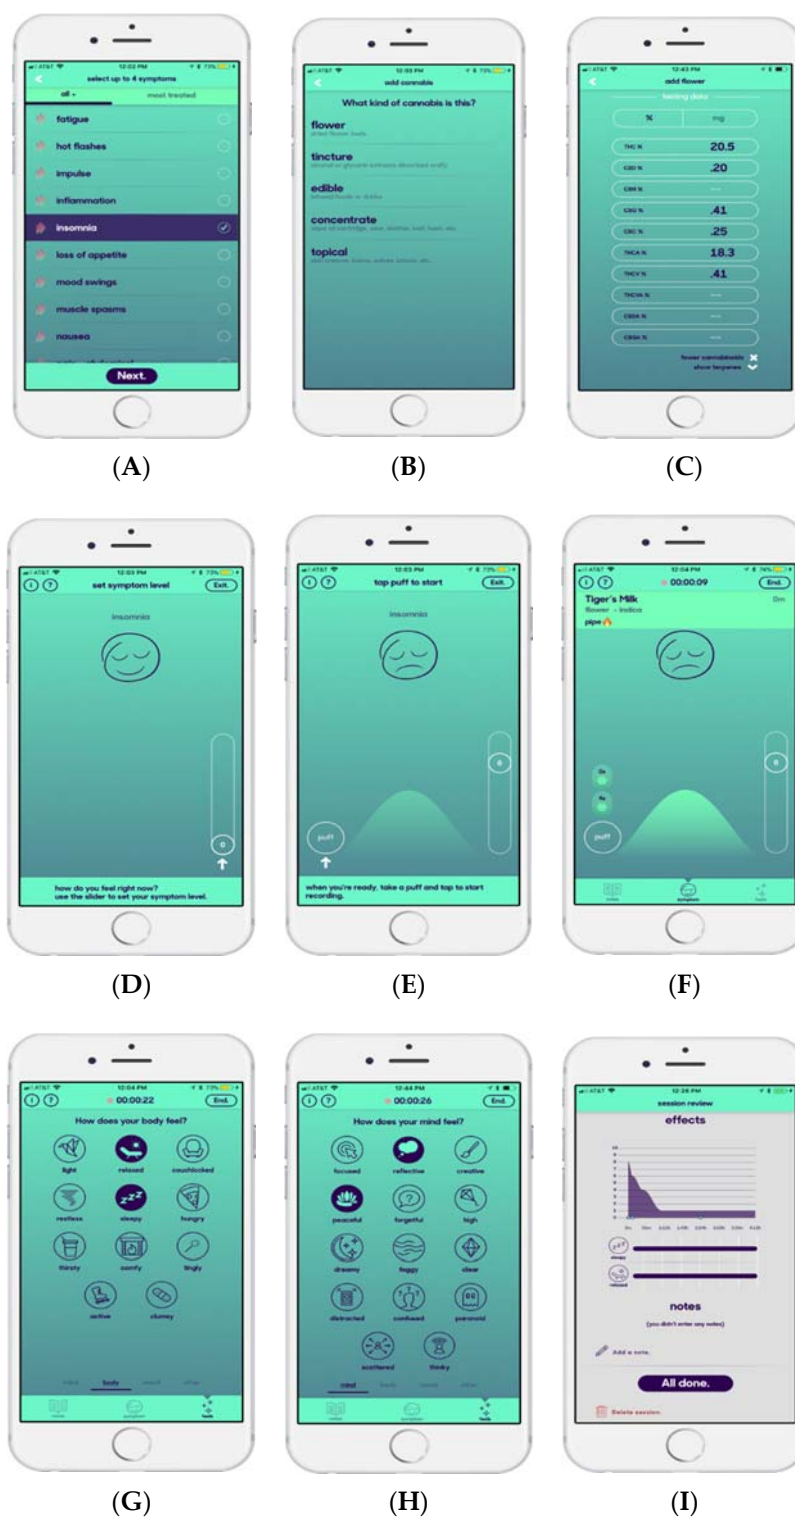

**Figure 1.** Releaf App™ User Interface. Notes: The panels show the user interface for: Indicating primary health condition (A); Selecting cannabis product type (B); Indicating Cannabis flower characteristics (C); Indicating baseline insomnia severity level (D); Directing the user to administer their medicine (E); Indicating post-consumption insomnia severity levels (F); Indicating body-associated side effects (G); Indicating mind-related side effects (H); Describing the user with feedback on their consumption session (I).
